# Supplementary material
Source: PubMed Central journal article supplement (PMC8121504)
Supplement: jci-131-149335-s196.pdf [file jci-131-149335-s196.pdf]

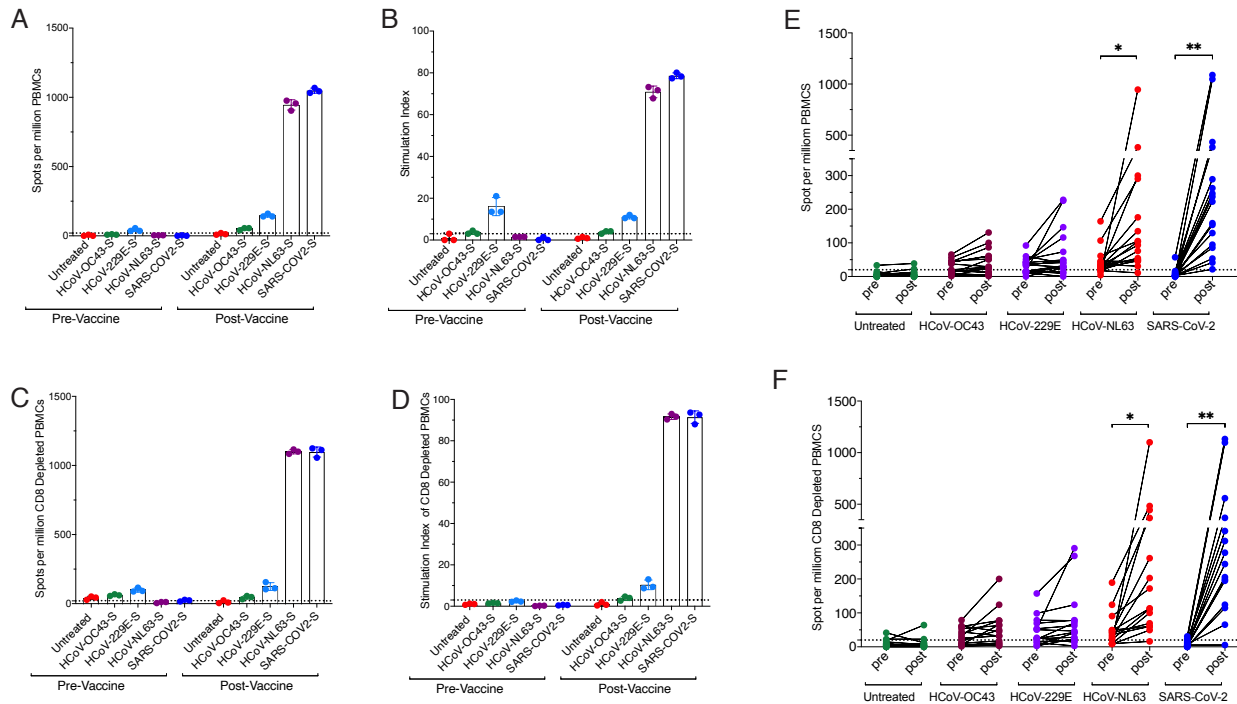

Supplemental Figure 1: T cell IFN- $\gamma$  responses to SARS-CoV-2 and CCCs. A representative IFN- $\gamma$  ELISpot from one donor (VR2) obtained pre- and post-vaccination (A-D). The spot forming units (SFU) and stimulation indices of PBMCs (A, B) and CD8+ T cell depleted PBMCs (C, D) in response to HCoV-NL63, HCoV-229E, HCoV-OC43 and SARS-CoV-2 peptide pools are shown. IFN- $\gamma$  ELISpot in PBMCs (E) and CD8 depleted PBMCs (F) in 15 donors obtained pre- and post-vaccination (replicate of Figure 1 to indicate change in T cell responses for each donor). Each data point represents the mean of 3 replicate values. Horizontal bars represent the median. \* $p = 0.0332$  and \*\* $P = 0.0021$ , by 2-tailed, paired Student's t test. Horizontal bars represent the median. (E-G) Correlation between post-vaccination SARS-CoV-2 PBMC ELISpot responses and pre-vaccination responses to HCoV-OC43, HCoV-229E and HCoV-NL63 respectively. Pearson correlation test,  $r=0.065$ ,  $0.36$  and  $0.12$  respectively ( $n=15$ ).



Supplementary Table 1: Peptides targeted by vaccine recipients' CD4+ T cells

| VR                                                                                                                                                                | #   | Amino acid # | Targeted peptide         | Predicted HLA-restricting alleles | SI  |
|-------------------------------------------------------------------------------------------------------------------------------------------------------------------|-----|--------------|--------------------------|-----------------------------------|-----|
| <b>VR14</b><br>DRB1*11:01<br>DRB3* 02:02<br>DQA1*05:05/DQB1*03:01<br>DPA1*01:03/DPB1*02:01<br>DPA1*01:03/DPB1*04:01                                               |     |              |                          |                                   |     |
|                                                                                                                                                                   | 64  | 442-458      | <u>DSKVGGNYNLYRLFRK</u>  | DRB1*11:01                        | 3.7 |
|                                                                                                                                                                   | 117 | 813-829      | <u>SKRSFIEDLLFNKVTLA</u> | DPA1*01:03/DPB1*04:01             | 5.1 |
| <b>VR20</b><br>DRB1*07:01, 15:02<br>DRB4* 01:01<br>DRB5*01:02<br>DQA1*02:01/DQB1*02:02<br>DQA1*01:03/DQB1*06:01<br>DPA1*01:03/DPB1*04:01                          |     |              |                          |                                   |     |
|                                                                                                                                                                   | 54  | 372-388      | ASFSTFKCYGVSP TKLN       | DRB1*15:02                        |     |
|                                                                                                                                                                   | 105 | 729-745      | <u>VSMTKTSVDCTMYICGD</u> | DQA1*02:01/DQB1*02:02             |     |
|                                                                                                                                                                   | 117 | 813-829      | <u>SKRSFIEDLLFNKVTLA</u> | DPA1*01:03/DPB1*04:01             | 3.7 |
| <b>VR21</b><br>DRB1*03:01, 15:01<br>DRB3* 01:01<br>DRB5*01:01<br>DQA1*05:01/DQB1*02:01<br>DQA1*01:02/DQB1*06:02<br>DPA1*02:01/DPB1*01:01<br>DPA1*02:06/DPB1*05:01 |     |              |                          |                                   |     |
|                                                                                                                                                                   | 28  | 190-206      | REFVFNKIDGYFKIYSK        | DRB5*01:01                        | 4   |
|                                                                                                                                                                   | 108 | 750-766      | <u>SNLLQYGSFCTQLNRA</u>  | DRB1*15:01                        | 8.9 |
|                                                                                                                                                                   | 117 | 813-829      | <u>SKRSFIEDLLFNKVTLA</u> | DPA1*02:01/DPB1*01:01             | 8.0 |
| <b>VR25</b><br>DRB1*07:01, 13:01<br>DRB3* 02:02<br>DRB5*01:02<br>DQA1*02:01/DQB1*02:02<br>DQA1*01:03/DQB1*06:03<br>DPA1*01:03/DPB1*01:01<br>DPA1*02:02/DPB1*02:01 |     |              |                          |                                   |     |
|                                                                                                                                                                   | 51  | 351-367      | <u>YAWNRRKISNCVADYSV</u> | DRB3*02:02                        | 4.1 |
|                                                                                                                                                                   | 88  | 610-626      | <u>VLYQDVNCTEVPVAIHA</u> | DRB1*13:01                        | 3.0 |
|                                                                                                                                                                   | 94  | 652-668      | <u>GAEHVNNSYECDIPIGA</u> | DQA1*02:01/DQB1*02:02             | 3.2 |
|                                                                                                                                                                   | 98  | 680-696      | <u>SPRRARSVASQSIIAYT</u> | DQA1*01:03/DQB1*06:03             | 4.1 |

|                                                                                                                                                                     |         |            |                           |                                     |      |
|---------------------------------------------------------------------------------------------------------------------------------------------------------------------|---------|------------|---------------------------|-------------------------------------|------|
|                                                                                                                                                                     | 117     | 813-829    | <u>SKRSFIEDLLFNKVTLA</u>  | DPA1*02:02/DPB1*02:01               | 4.8  |
| VR                                                                                                                                                                  | Peptide | Amino acid | Targeted peptide          | HLA alleles                         | SI   |
| <b>VR28</b><br>DRB1*04:04,11:01,<br>DRB3*0202,<br>DRB4*0103,<br>DQA1*03:01/DQB1*03:02,<br>DQA1*05:05/DQB1*03:01,<br>DPA1*01:03/DPB1*06:01,<br>DPA1*02:01/DPB1*14:01 |         |            |                           |                                     |      |
|                                                                                                                                                                     | 13      | 85-101     | <u>PFNDGVYFASTEKSNII</u>  | DRB3*02:02                          | 7.5  |
|                                                                                                                                                                     | 15      | 99-115     | <u>NIIRGWIFGTTLDSKTQ</u>  | DPA1*01:03/<br>DPB1*06:01           | 14.5 |
|                                                                                                                                                                     | 18      | 120-136    | <u>VNNATNVVIKVFCEQFC</u>  | DRB3*02:02                          | 7.5  |
|                                                                                                                                                                     | 20      | 134-150    | <u>QFCNDPFLGVYHKNNK</u>   | DRB1*11:01                          | 10.5 |
|                                                                                                                                                                     | 51      | 351-367    | <u>YAWNRRKRISNCVADYSV</u> | DRB3*02:02,<br>DRB4*01:03           | 18.5 |
|                                                                                                                                                                     | 54      | 372-388    | <u>ASFSTFKCYGVSPTKLN</u>  | DPA1*01:03/DPB1*06:01               | 14.5 |
|                                                                                                                                                                     | 56      | 386-402    | <u>KLNDLCFTNVYADSFVI</u>  | DPA1*02:01/DPB1*14:01               | 17.5 |
|                                                                                                                                                                     | 58      | 400-416    | <u>FVIRGDEVQRQIAPGQTG</u> | DQA1*05:05/DQB1*03:01               | 14.5 |
|                                                                                                                                                                     | 132     | 918-934    | <u>ENQKLIANQFNSAIGKI</u>  | DRB3*02:02                          | 16   |
|                                                                                                                                                                     | 138     | 960-976    | <u>NTLVKQLSSNFGAISSV</u>  | DRB3*02:02                          | 22   |
| <b>VR32</b><br>DRB1*01:01, 07:01,<br>DRB4* 01:01,<br>DQA1*02:01/DQB1*02:02<br>DQA1*01:01/DQB1*05:01<br>DPA1*01:03/DPB1*04:01                                        |         |            |                           |                                     |      |
|                                                                                                                                                                     | 2       | 8-24       | <u>LPLVSSQCVNLTTRTQL</u>  | DRB4*01:01                          | 4.8  |
|                                                                                                                                                                     | 6       | 36-52      | <u>VYYPDKVFRSSVLHSTQ</u>  | DPA1*01:03/DPB1*04:01               | 8.4  |
|                                                                                                                                                                     | 24      | 162-178    | <u>SANNCTFEYVSQPFLMD</u>  | DPA1*01:03/DPB1*04:01               | 10.2 |
|                                                                                                                                                                     | 28      | 190-206    | <u>REFVFKNIDGYFKIYSK</u>  | DQA1*01:01/DQB1*05:01<br>DRB5*01:01 | 8.8  |
|                                                                                                                                                                     | 103     | 715-731    | <u>PTNFTISVTTEILPVSM</u>  | DRB1*07:01                          | 8    |
|                                                                                                                                                                     | 105     | 729-745    | <u>VSMTKTSVDCTMYICGD</u>  | DQA1*02:01/DQB1*02:02               | 13   |
|                                                                                                                                                                     |         |            |                           |                                     |      |

|                                                                                                                                                                   |     |         |                                 |                       |     |
|-------------------------------------------------------------------------------------------------------------------------------------------------------------------|-----|---------|---------------------------------|-----------------------|-----|
| <b>VR36</b><br>DRB1*01:01, 15:01<br>DRB5*01:01<br>DQA1*01:01/DQB1*05:01<br>DQA1*01:03/DQB1*06:01<br>DPA1*01:03/DPB1*04:01                                         |     |         |                                 |                       |     |
|                                                                                                                                                                   | 108 | 750-766 | <u>SNLLQYGSFCTQLNRA</u>         | DRB1*15:01            | 3.2 |
|                                                                                                                                                                   | 117 | 813-829 | <u>SKRSFIEDLLFNKVTLA</u>        | DPA1*01:03/DPB1*04:01 | 4.9 |
| <b>VR40</b><br>DRB1*03:01, 15:01<br>DRB3* 01:01<br>DRB5*01:01<br>DQA1*05:01/DQB1*02:01<br>DQA1*01:02/DQB1*06:02<br>DPA1*01:03/DPB1*04:01<br>DPA1*01:03/DPB1*06:01 |     |         |                                 |                       |     |
|                                                                                                                                                                   | 108 | 750-766 | <u>SNLLQYGSFCTQLNRA</u>         | HLA-DRB1*15:01        | 6.8 |
|                                                                                                                                                                   | 117 | 813-829 | <u>SKRSFIEDLLFNKVTLA</u>        | DPA1*01:03/DPB1*04:01 | 4.7 |
| <b>VR41</b><br>DRB1*07:01,11:01<br>DRB3*0202<br>DQA1*02:01/DQB1*03:03<br>DQA1*05:05/DQB1*03:01<br>DPA1*01:03/DPB1*04:01<br>DPA1*02:01/DPB1*13:01                  |     |         |                                 |                       |     |
|                                                                                                                                                                   | 21  | 141-157 | <u>LG<b>V</b>YHKNKSWMESEF</u>   | DRB3*02:02            | 4.8 |
|                                                                                                                                                                   | 98  | 680-696 | <u>S<b>P</b>RRARSVASQSIIAYT</u> | DQA1*02:01/DQB1*03:03 | 3.6 |
|                                                                                                                                                                   | 105 | 729-745 | <u>V<b>S</b>MTKTSVDCTMYICGD</u> | DQA1*02:01/DQB1*03:03 | 5.0 |

\*Predicted optimal epitopes are underlined

SI= stimulation index

Amino acids in red font are present in B.1.1.7 and B.1.351 variants
